# Supplementary material for: Assessment of functional and structural changes of soil fungal and oomycete communities in holm oak declined dehesas through metabarcoding analysis
Source: PubMed Central journal article supplement (PMC6441054; doi:10.1038/s41598-019-41804-y), 2019-03-29
Supplement: 41598_2019_41804_MOESM1_ESM.pdf [file 41598_2019_41804_MOESM1_ESM.pdf]

Assessment of functional and structural changes of soil fungal and oomycete communities in holm oak declined *dehesas* through metabarcoding analysis.

Francisco J. Ruiz Gómez, Rafael M. Navarro Cerrillo, Alejandro Pérez-de-Luque, Wolfgang Oßwald, Andrea Vannini, Carmen Morales-Rodríguez.

**SUPPLEMENTARY INFORMATION**

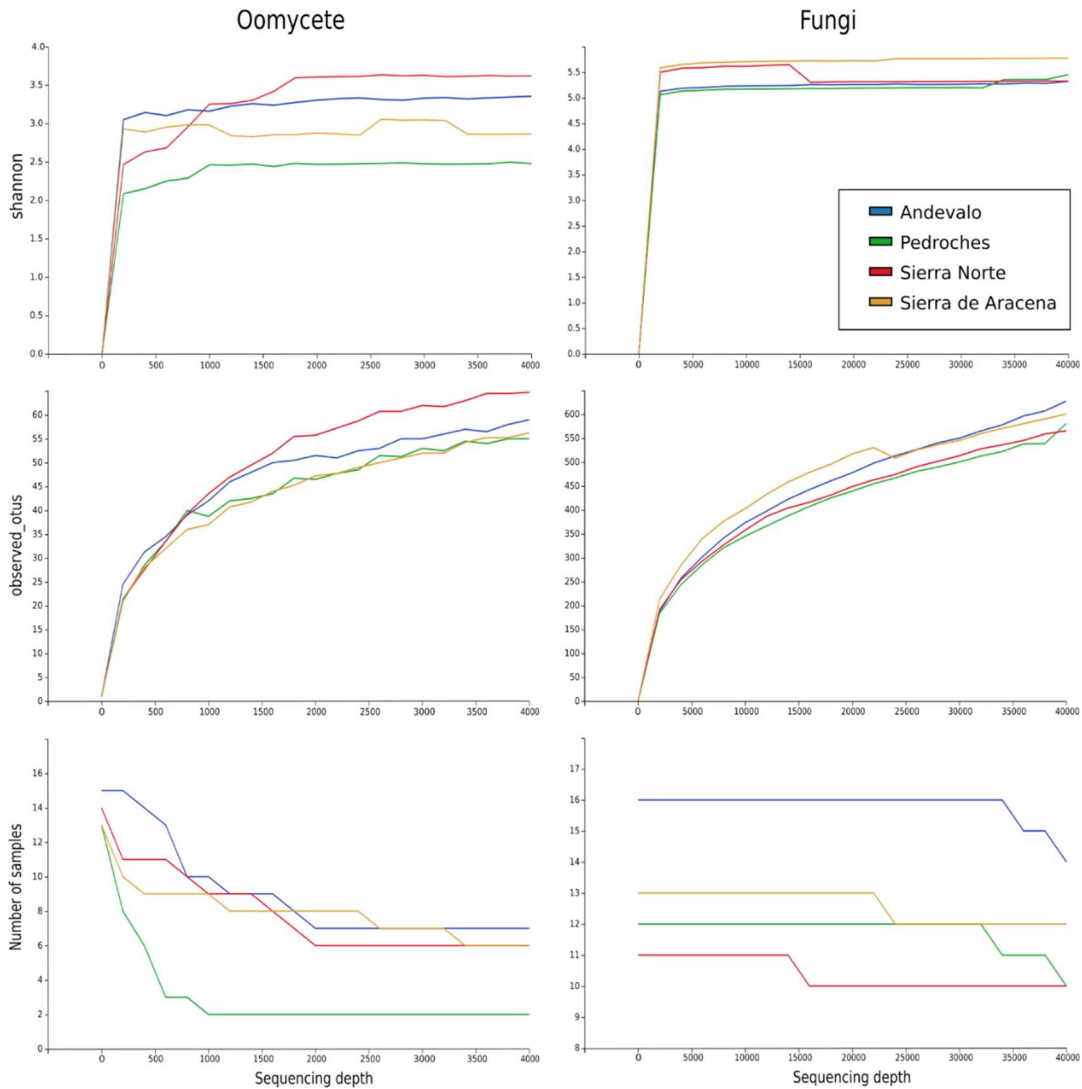

**Fig. S1:** Rarefaction analysis of oomycete (left) and fungi (right) raw datasets of soil total DNA library, from soil samples of *Quercus ilex* dehesas of the Andalusian Network for Damage Monitoring in Forest Ecosystems

**Table S1:** Number of OTUs identified for each class (fungus) or genus (oomycetes) (see Fig. 1 for relative abundance). UI: Unidentified taxon at the selected level (class).

| <b>Class (Fungi)</b>    | <b>#OTUs</b> | <b>Genus (Oomycetes)</b>    | <b>#OTUs</b> |
|-------------------------|--------------|-----------------------------|--------------|
| c__Agaricomycetes       | 565          | g__Pythium                  | 84           |
| c__Sordariomycetes      | 510          | g__Phytophthora             | 48           |
| UI Ascomycota           | 402          | g__Saprolegnia              | 8            |
| c__Eurotiomycetes       | 307          | g__Lagena                   | 7            |
| c__Dothideomycetes      | 293          | g__Aphanomyces              | 6            |
| c__Glomeromycetes       | 153          | g__Achlya                   | 3            |
| c__Leotiomycetes        | 122          | g__Myzocytiopsis            | 3            |
| c__Pezizomycetes        | 88           | g__Elongisporangium         | 3            |
| UI Basidiomycota        | 84           | g__Lagenidium               | 3            |
| c__Mortierellomycetes   | 75           | g__Leptolegnia              | 2            |
| c__Tremellomycetes      | 45           | g__Peronospora              | 2            |
| c__Chytridiomycetes     | 35           | g__Apodachlya               | 2            |
| UI Chytridiomycota      | 24           | g__Dictyuchus               | 1            |
| c__Saccharomycetes      | 12           | g__Halophytophthora         | 1            |
| c__Microbotryomycetes   | 10           | s__Paralagenidium karlingii | 1            |
| UI Zygomycota           | 9            | g__Plectospora              | 1            |
| c__Lecanoromycetes      | 7            | g__Phytopythium             | 1            |
| c__Geoglossomycetes     | 6            | g__Elongisporangium         | 1            |
| c__Orbiliomycetes       | 5            | g__Phytophthora             | 1            |
| o__Umbelopsidales       | 5            |                             |              |
| g__Pseudosigmoidea      | 4            |                             |              |
| c__Arthoniomycetes      | 2            |                             |              |
| c__Basidiobolomycetes   | 2            |                             |              |
| c__Cystobasidiomycetes  | 2            |                             |              |
| c__Entorrhizomycetes    | 2            |                             |              |
| c__Geminibasidiomycetes | 2            |                             |              |
| c__Kickxellomycotina    | 2            |                             |              |
| g__Calcarisporiella     | 2            |                             |              |
| g__Knufia               | 2            |                             |              |
| UI Blastocladiomycota   | 2            |                             |              |
| c__Tritirachiomycetes   | 1            |                             |              |
| c__Wallemiomycetes      | 1            |                             |              |
| g__Leptodiscella        | 1            |                             |              |
| g__Subulispora          | 1            |                             |              |
| o__Mucorales            | 1            |                             |              |
| o__Zoopagales           | 1            |                             |              |

1 **Table S2:** Plots selected for the study among points in *Quercus ilex* dehesas of the Andalusian Network for Damage Monitoring in Forest Ecosystems, and  
 2 their main characteristics. X, Y coordinates in ETRS89 / UTM Zone 30

| Plot code | UTMX   | UTMY    | Zone  | Prov.   | Defoliation. (%) | Defoliation class | Root rot presence | <i>Q. ilex</i> (%) | Annual Precipitation. (mm) | Evapotranspiration (mm) | Annual temperature. T (°C) | Elevation. (m.a.s.l.) |
|-----------|--------|---------|-------|---------|------------------|-------------------|-------------------|--------------------|----------------------------|-------------------------|----------------------------|-----------------------|
| CO1004    | 313548 | 4276464 | Pedr  | Cordoba | 35.2             | C2                | Yes               | 100%               | 524.17                     | 1481.88                 | 15.94                      | 487                   |
| CO1013    | 330568 | 4271091 | Pedr  | Cordoba | 30.6             | C2                | Yes               | 100%               | 546.29                     | 1509.15                 | 16.16                      | 494                   |
| CO1023    | 339741 | 4264392 | Pedr  | Cordoba | 43.5             | C2                | Yes               | 100%               | 527.86                     | 1472.18                 | 16.11                      | 534                   |
| CO1029    | 301451 | 4250271 | Pedr  | Cordoba | 25.0             | C2                | Yes               | 100%               | 497.68                     | 1453.79                 | 15.51                      | 594                   |
| CO1055    | 327694 | 4238224 | Pedr  | Cordoba | 26.5             | C2                | Yes               | 100%               | 584.06                     | 1433.67                 | 15.47                      | 643                   |
| CO1060    | 367208 | 4244448 | Pedr  | Cordoba | 22.1             | C1                | Yes               | 100%               | 640.99                     | 1409.91                 | 15.51                      | 648                   |
| CO1101    | 347254 | 4217003 | Pedr  | Cordoba | 25.1             | C2                | No                | 100%               | 591.68                     | 1538.49                 | 17.06                      | 243                   |
| CO1121    | 294529 | 4192414 | S.Nor | Cordoba | 19.4             | C1                | Yes               | 92%                | 677.90                     | 1538.55                 | 16.91                      | 208                   |
| HU1001    | 159238 | 4227729 | Arac  | Huelva  | 56.9             | C2                | Yes               | 85%                | 767.31                     | 1452.90                 | 16.29                      | 344                   |
| HU1007    | 130122 | 4206909 | Arac  | Huelva  | 23.3             | C1                | Yes               | 100%               | 693.05                     | 1458.21                 | 16.94                      | 199                   |
| HU1025    | 202588 | 4210264 | Arac  | Huelva  | 13.3             | C1                | Yes               | 100%               | 791.76                     | 1363.70                 | 15.80                      | 581                   |
| HU1027    | 124740 | 4189836 | Andv  | Huelva  | 26.0             | C2                | Yes               | 100%               | 677.72                     | 1521.43                 | 17.10                      | 209                   |
| HU1028    | 132652 | 4191150 | Andv  | Huelva  | 37.1             | C2                | No                | 100%               | 751.12                     | 1423.43                 | 16.66                      | 298                   |
| HU1040    | 110198 | 4179458 | Andv  | Huelva  | 21.9             | C1                | Yes               | 100%               | 657.76                     | 1545.53                 | 17.62                      | 154                   |
| HU1052    | 205011 | 4194513 | Arac  | Huelva  | 20.0             | C1                | Yes               | 100%               | 687.37                     | 1438.48                 | 17.13                      | 330                   |
| HU1060    | 143033 | 4176569 | Andv  | Huelva  | 22.9             | C1                | Yes               | 96%                | 708.56                     | 1476.12                 | 17.39                      | 171                   |
| HU1069    | 214215 | 4187820 | Arac  | Huelva  | 25.8             | C2                | Yes               | 100%               | 725.28                     | 1414.34                 | 17.14                      | 299                   |
| HU1082    | 113946 | 4155755 | Andv  | Huelva  | 18.1             | C1                | Yes               | 100%               | 568.35                     | 1499.95                 | 17.80                      | 144                   |
| HU1094    | 123107 | 4149092 | Andv  | Huelva  | 20.4             | C1                | Yes               | 100%               | 588.43                     | 1463.71                 | 18.03                      | 106                   |
| HU1096    | 138927 | 4151764 | Andv  | Huelva  | 41.9             | C2                | Yes               | 100%               | 617.99                     | 1396.96                 | 17.95                      | 116                   |
| PULIDOS   | 115904 | 4171666 | Andv  | Huelva  | 18.1             | C1                | Yes               | 100%               | 596.59                     | 1515.93                 | 17.67                      | 148                   |
| SE1005    | 257837 | 4219069 | S.Nor | Sevilla | 14.8             | C1                | Yes               | 100%               | 706.77                     | 1360.79                 | 15.16                      | 663                   |
| SE1024    | 253659 | 4194150 | S.Nor | Sevilla | 25.2             | C2                | Yes               | 100%               | 740.25                     | 1451.89                 | 16.20                      | 433                   |
| SE1040    | 270746 | 4188715 | S.Nor | Sevilla | 18.5             | C1                | No                | 100%               | 765.73                     | 1424.86                 | 16.22                      | 380                   |
| SE1048    | 240366 | 4175736 | S.Nor | Sevilla | 21.9             | C1                | Yes               | 100%               | 684.96                     | 1483.04                 | 16.99                      | 283                   |
| SE1050    | 256188 | 4178282 | S.Nor | Sevilla | 21.7             | C1                | Yes               | 92%                | 665.11                     | 1472.05                 | 17.35                      | 170                   |

Average defoliation by zone  $\pm$  SE: Andv: 25.8 $\pm$ 3.2 %; Arac: 27.8 $\pm$ 7.5 %; Pedr: 29.7 $\pm$ 2.8 % S.Nor: 20.23 $\pm$ 1.4 %

**Table S3:** Control mock communities' composition. Oo=: Oomycete control with the same concentration of DNA for each specie (ng DNA). Oo≠: Oomycete control with different concentration of DNA for each specie (ng DNA). F=: Fungal control community with the same concentration of DNA for each specie (ng DNA). F≠: Fungal control community with different concentration for each specie (ng DNA).

| <b>Oomycete controls</b> |                                    |            |            | <b>Fungi controls</b> |                               |           |           |
|--------------------------|------------------------------------|------------|------------|-----------------------|-------------------------------|-----------|-----------|
| <b>Strain</b>            | <b>Name</b>                        | <b>Oo=</b> | <b>Oo≠</b> | <b>Strain</b>         | <b>Name</b>                   | <b>F≠</b> | <b>F=</b> |
| SYLV                     | <i>Pytium sylvaticum</i>           | 7.7        | 10         | T20                   | <i>Tricoderma asper</i>       | 12.5      | 8.3       |
| CAM124                   | <i>Phytophthora cambivora</i>      | 7.7        | 2          | T21                   | <i>Tricoderma virens</i>      | 5         | 8.3       |
| CIN10                    | <i>Phytophthora cinnamomi</i>      | 7.7        | 5          | B1.31                 | <i>Mortierella elongata</i>   | 10        | 8.3       |
| B1IPq                    | <i>Phytophthora quercina</i>       | 7.7        | 5          | F.oxy                 | <i>Fusarium oxysporum</i>     | 7.5       | 8.3       |
| UND22                    | <i>Elongisporangium undulatum</i>  | 7.7        | 1          | TA                    | <i>Fusarium ad</i>            | 2.5       | 8.3       |
| GON36                    | <i>Phytophthora gonapodyides</i>   | 7.7        | 10         | VDC3574               | <i>Vericilium dalie</i>       | 10        | 8.3       |
| 1eC                      | <i>Elongisporangium anandrum</i>   | 7.7        | 2          | VTC3554               | <i>Verticillium tricorpus</i> | 2.5       |           |
| CAC34                    | <i>hytophthora cactorum</i>        | 7.7        | 10         |                       |                               | 50.0      | 50.0      |
| CIT55                    | <i>Phytophthora plurivora</i>      | 7.7        | 20         |                       |                               |           |           |
| 4BO                      | <i>Pphytophthora cithophthora</i>  | 7.7        | 5          |                       |                               |           |           |
| MEG16                    | <i>Phytophthora megasperma</i>     | 7.7        | 10         |                       |                               |           |           |
| AH1/2-5                  | <i>Phytophthora cryptogea</i>      | 7.7        | 10         |                       |                               |           |           |
| PSEU1                    | <i>Phytophthora pseudosyringae</i> | 7.7        | 10         |                       |                               |           |           |
|                          |                                    | 100.1      | 100        |                       |                               |           |           |

**Table S4: Barcodelabel tagged primers ITS 1F/ ITS 2 (Fungal dataset)**

| <b>ID</b> | <b>Plot_code</b> | <b>Barcode primer ITS 1F</b>       | <b>Barcode primer ITS 2</b>      |
|-----------|------------------|------------------------------------|----------------------------------|
| 1-1       | CO1121           | CTACGGCTGATTCTYGGTCATTTAGAGGAAGTAA | GAATGTAGCHRCGTTCTTCATCGDTGC      |
| 1-2       | CO1013           | CGCCTGCGCTTTCTYGGTCATTTAGAGGAAGTAA | ATAAACTGCHRCGTTCTTCATCGDTGC      |
| 1-3       | CO1101           | CACCTGATGATCTYGGTCATTTAGAGGAAGTAA  | GTTACCGAGCHRCGTTCTTCATCGDTGC     |
| 1-4       | CO1023           | CAAGAGATAACTYGGTCATTTAGAGGAAGTAA   | GCTAGGCACGCHRCGTTCTTCATCGDTGC    |
| 1-5       | CO1055           | TGTAGTGTCTYGGTCATTTAGAGGAAGTAA     | ATGCTGGAATGCHRCGTTCTTCATCGDTGC   |
| 1-6       | CO1013           | TTCTTCCACTYGGTCATTTAGAGGAAGTAA     | CATAATTCAACGCHRCGTTCTTCATCGDTGC  |
| 1-8       | CO1101           | CTACCATATAACTYGGTCATTTAGAGGAAGTAA  | AGGTAAGCGCHRCGTTCTTCATCGDTGC     |
| 2-1       | CO1029           | TCAACATGTACTCTYGGTCATTTAGAGGAAGTAA | GCGATGCGCHRCGTTCTTCATCGDTGC      |
| 2-2       | CO1060           | CGAATACGAACCTYGGTCATTTAGAGGAAGTAA  | AGGAGACGGCHRCGTTCTTCATCGDTGC     |
| 2-3       | CO1004           | GACCAGAGACCTYGGTCATTTAGAGGAAGTAA   | CCTGCCAGAGCHRCGTTCTTCATCGDTGC    |
| 2-4       | CO1055           | TGCCATTGGCTYGGTCATTTAGAGGAAGTAA    | GTAGGTTAGAGCHRCGTTCTTCATCGDTGC   |
| 2-5       | CO1121           | GAACAGTCTYGGTCATTTAGAGGAAGTAA      | CTGAGGCGGATAGCHRCGTTCTTCATCGDTGC |
| 2-6       | CO1060           | GAATGCCAATACCTYGGTCATTTAGAGGAAGTAA | AGAATAAGCHRCGTTCTTCATCGDTGC      |
| 2-7       | CO1029           | GGATTTAAAGACTYGGTCATTTAGAGGAAGTAA  | ATAACGGTGCHRCGTTCTTCATCGDTGC     |
| 2-8       | CO1004           | ACCGCAAGACTYGGTCATTTAGAGGAAGTAA    | TTGTAGCGGCHRCGTTCTTCATCGDTGC     |
| 3-1       | SE1005           | CCGGACACTCTYGGTCATTTAGAGGAAGTAA    | TGCGTGCTCCGCHRCGTTCTTCATCGDTGC   |
| 3-2       | SE1050           | TGATTTGGCTYGGTCATTTAGAGGAAGTAA     | AAGACGGAAGTCHRCGTTCTTCATCGDTGC   |
| 3-3       | SE1005           | TTGGTAGCTYGGTCATTTAGAGGAAGTAA      | CTTTCAGTAAGGGCHRCGTTCTTCATCGDTGC |
| 3-4       | SE1024           | AGTATATCCTACCTYGGTCATTTAGAGGAAGTAA | CAGCCTAGCHRCGTTCTTCATCGDTGC      |
| 3-5       | SE1040           | CTACTATGATCTYGGTCATTTAGAGGAAGTAA   | ATCTGCCAGCHRCGTTCTTCATCGDTGC     |
| 3-6       | SE1024           | GCCGCTCTACTYGGTCATTTAGAGGAAGTAA    | TTTCTACTTGCHRCGTTCTTCATCGDTGC    |
| 3-7       | SE1050           | CTAGCTAAGCTYGGTCATTTAGAGGAAGTAA    | GCAGGAGATTGCHRCGTTCTTCATCGDTGC   |
| 3-8       | SE1040           | TCGAGTACCTYGGTCATTTAGAGGAAGTAA     | CCAATAGACATGCHRCGTTCTTCATCGDTGC  |
| 4-1       | HU1007           | AAGTTGACTYGGTCATTTAGAGGAAGTAA      | GTTTGTGCGCCAGCHRCGTTCTTCATCGDTGC |
| 4-2       | HU1001           | ATACCTCACAACTYGGTCATTTAGAGGAAGTAA  | CTGTCCTGCHRCGTTCTTCATCGDTGC      |
| 4-3       | HU1052           | CCACTCATAACTYGGTCATTTAGAGGAAGTAA   | GCCTGCACGCHRCGTTCTTCATCGDTGC     |
| 4-4       | PULIDOS          | CGAACCATACTYGGTCATTTAGAGGAAGTAA    | GTGAAGCTGGCHRCGTTCTTCATCGDTGC    |
| 4-5       | SE1048           | TCGGCGAGCCTYGGTCATTTAGAGGAAGTAA    | GCCTTGACCAGCHRCGTTCTTCATCGDTGC   |
| 4-6       | SE1050           | CGACAGAGCTYGGTCATTTAGAGGAAGTAA     | GAGGCGTACAAGCHRCGTTCTTCATCGDTGC  |
| 4-7       | SE1048           | ATCTGGTCTYGGTCATTTAGAGGAAGTAA      | TTATACTCCATGCHRCGTTCTTCATCGDTGC  |
| 4-8       | SE1024           | TAAAGGATAGGCTYGGTCATTTAGAGGAAGTAA  | GCGTGTTGCHRCGTTCTTCATCGDTGC      |
| 5-1       | HU1069           | TTAGCAAAGCCTYGGTCATTTAGAGGAAGTAA   | CCGTTCCGCGCHRCGTTCTTCATCGDTGC    |
| 5-2       | HU1096           | GACATTGCGACCCTYGGTCATTTAGAGGAAGTAA | TAGGAACGCHRCGTTCTTCATCGDTGC      |
| 5-3       | HU1007           | TGGCCTGGACTYGGTCATTTAGAGGAAGTAA    | GTAGTGAATGCHRCGTTCTTCATCGDTGC    |
| 5-4       | HU1082           | CGTCCAGAACAACTYGGTCATTTAGAGGAAGTAA | ACTGGTAGCHRCGTTCTTCATCGDTGC      |
| 5-5       | HU1007           | AGACCACATTCTYGGTCATTTAGAGGAAGTAA   | GGAGACCAGGCHRCGTTCTTCATCGDTGC    |
| 5-6       | HU1082           | CTAGTACCACTCTYGGTCATTTAGAGGAAGTAA  | TCTTTAATGCHRCGTTCTTCATCGDTGC     |
| 5-7       | HU1069           | GGACCTCTACTYGGTCATTTAGAGGAAGTAA    | AGACGCGAAGCHRCGTTCTTCATCGDTGC    |
| 5-8       | HU1094           | TCGATCCGACTYGGTCATTTAGAGGAAGTAA    | CGTTTCTAGAGCHRCGTTCTTCATCGDTGC   |
| 6-1       | HU1027           | ATATTAAGCTYGGTCATTTAGAGGAAGTAA     | GGAATACGTTGGCHRCGTTCTTCATCGDTGC  |

|     |           |                                    |                                   |
|-----|-----------|------------------------------------|-----------------------------------|
| 6-2 | HU1052    | TGTTATGCTYGGTCATTTAGAGGAAGTAA      | GAATCTCAAATAGCHRCGTTCTTCATCGDTGC  |
| 6-3 | HU1040    | GTGCGAACTAGCCTYGGTCATTTAGAGGAAGTAA | TGTTTATGCHRCGTTCTTCATCGDTGC       |
| 6-4 | HU1040    | TGGCACAGCTACTYGGTCATTTAGAGGAAGTAA  | CGCTTGATGCHRCGTTCTTCATCGDTGC      |
| 6-5 | HU1001    | CCTGACATACCTYGGTCATTTAGAGGAAGTAA   | GCGTCCTCGGCHRCGTTCTTCATCGDTGC     |
| 6-6 | HU1052    | TGGCATAGACTYGGTCATTTAGAGGAAGTAA    | CGCAGACACTGCHRCGTTCTTCATCGDTGC    |
| 6-7 | HU1025    | GAGGCACAACCTYGGTCATTTAGAGGAAGTAA   | AGATAAAGACTGCHRCGTTCTTCATCGDTGC   |
| 6-8 | HU1060    | CTACACCGCTYGGTCATTTAGAGGAAGTAA     | TCTACTTGTTTGCHRCGTTCTTCATCGDTGC   |
| 7-1 | HU1001    | TCGTGATCTYGGTCATTTAGAGGAAGTAA      | CCTCTCACATGGGCHRCGTTCTTCATCGDTGC  |
| 7-2 | HU1094    | CGCTCGGACTYGGTCATTTAGAGGAAGTAA     | TCAGACCTCAGCHRCGTTCTTCATCGDTGC    |
| 7-3 | HU1028    | AGCCTATCCTTTCTYGGTCATTTAGAGGAAGTAA | GGTCAGAGCHRCGTTCTTCATCGDTGC       |
| 7-4 | HU1096    | ACGTGTGCTYGGTCATTTAGAGGAAGTAA      | CCGCGTTCACCTGCHRCGTTCTTCATCGDTGC  |
| 7-5 | HU1069    | ACATATCATAGCTYGGTCATTTAGAGGAAGTAA  | GTGGCTTTGCHRCGTTCTTCATCGDTGC      |
| 7-6 | HU1028    | AACTGGCACCCCTYGGTCATTTAGAGGAAGTAA  | CTCATTCTGCHRCGTTCTTCATCGDTGC      |
| 7-7 | HU1094    | CGTCCTTCGCTYGGTCATTTAGAGGAAGTAA    | GGCTTAATTAGCHRCGTTCTTCATCGDTGC    |
| 7-8 | HU1060    | GACACTGTCTYGGTCATTTAGAGGAAGTAA     | ATGCACCAGCAGCHRCGTTCTTCATCGDTGC   |
| 8-1 | HU1025    | GCTCCGCCTYGGTCATTTAGAGGAAGTAA      | CGAAAACGCTATAGCHRCGTTCTTCATCGDTGC |
| 8-2 | PULIDOS   | TGCGACTGTGGCCTYGGTCATTTAGAGGAAGTAA | GTCCAGCGCHRCGTTCTTCATCGDTGC       |
| F=  | Control 1 | CTTTAATAGCCTYGGTCATTTAGAGGAAGTAA   | GATTGAAACGCHRCGTTCTTCATCGDTGC     |
| F=  | Control 1 | GGCATTAAACCTYGGTCATTTAGAGGAAGTAA   | CAGGCAAGCAGCHRCGTTCTTCATCGDTGC    |
| F=  | Control 1 | TGCCTTCACTYGGTCATTTAGAGGAAGTAA     | GGATCACTCCTGCHRCGTTCTTCATCGDTGC   |
| F≠  | Control 2 | GCCTAAGCTYGGTCATTTAGAGGAAGTAA      | TTAGGAACAATTGCHRCGTTCTTCATCGDTGC  |
| F≠  | Control 2 | TTTGAATACCACCTYGGTCATTTAGAGGAAGTAA | AGCTCAAGCHRCGTTCTTCATCGDTGC       |
| F≠  | Control 2 | TCCGTAAGCTYGGTCATTTAGAGGAAGTAA     | CGTTTGCCGCHRCGTTCTTCATCGDTGC      |

**Table S5: Barcodelabel tagged primers ITS 6/ ITS 7 (Oomycete dataset)**

| <b>ID</b> | <b>Plot_code</b> | <b>Barcode primer ITS_6</b>       | <b>Barcode primer ITS_7</b>      |
|-----------|------------------|-----------------------------------|----------------------------------|
| 1-1       | CO1121           | CTTAATCCAGGTGAAGGTGAAGTCGTAACAAGG | TCCGCCTAGCGTTCTTCATCGATGTGC      |
| 1-2       | CO1013           | GCCAGTTCAGTAGAAGGTGAAGTCGTAACAAGG | TGTACGAAGCGTTCTTCATCGATGTGC      |
| 1-3       | CO1101           | CCTAAGATGTTGAAGGTGAAGTCGTAACAAGG  | TGCACTCAAGCGTTCTTCATCGATGTGC     |
| 1-4       | CO1023           | GTCAGAGGCAGAAGGTGAAGTCGTAACAAGG   | ATGCGAGACAGCGTTCTTCATCGATGTGC    |
| 1-5       | CO1055           | CATACATGAAGGTGAAGTCGTAACAAGG      | AAATAGGCAATAAGCGTTCTTCATCGATGTGC |
| 1-6       | CO1013           | CATACGCAGAAGGTGAAGTCGTAACAAGG     | GGCATCTAATAAGCGTTCTTCATCGATGTGC  |
| 1-8       | CO1101           | CCGAAACCGACGAAGGTGAAGTCGTAACAAGG  | GCATACAGAGCGTTCTTCATCGATGTGC     |
| 2-1       | CO1029           | GTCCACATAATCGAAGGTGAAGTCGTAACAAGG | TAGCCGAAGCGTTCTTCATCGATGTGC      |
| 2-2       | CO1060           | CCAGAATTAGAGAAGGTGAAGTCGTAACAAGG  | TTGGCTAGAGCGTTCTTCATCGATGTGC     |
| 2-3       | CO1004           | CACGTAAGTCGAAGGTGAAGTCGTAACAAGG   | TGTGATCTAAGCGTTCTTCATCGATGTGC    |
| 2-4       | CO1055           | GACTAGCTGGAAGGTGAAGTCGTAACAAGG    | ATACCAAAGTACGTTCTTCATCGATGTGC    |
| 2-5       | CO1121           | ACGTTAAGGAAGGTGAAGTCGTAACAAGG     | CAGATCCGCTACGCGTTCTTCATCGATGTGC  |
| 2-6       | CO1060           | GTCGAGGGAAGGTGAAGTCGTAACAAGG      | TAATCGTCTAATAGCGTTCTTCATCGATGTGC |
| 2-7       | CO1029           | AGTTTGTAGTAAGAAGGTGAAGTCGTAACAAGG | GCGCCATAGCGTTCTTCATCGATGTGC      |
| 2-8       | CO1004           | ACGGAGCTACCGAAGGTGAAGTCGTAACAAGG  | GCATTTGAAGCGTTCTTCATCGATGTGC     |
| 3-1       | SE1005           | TCTAGTGCCTACGAAGGTGAAGTCGTAACAAGG | GATCACTAGCGTTCTTCATCGATGTGC      |
| 3-2       | SE1050           | ATTGTGGTGGAAGGTGAAGTCGTAACAAGG    | GAATGGTCAGAGCGTTCTTCATCGATGTGC   |
| 3-3       | SE1005           | ACGAATCAACTGAAGGTGAAGTCGTAACAAGG  | CTGCGTTCAGCGTTCTTCATCGATGTGC     |
| 3-4       | SE1024           | GGCGACAGAAGGTGAAGTCGTAACAAGG      | ACGCTATGATGTAGCGTTCTTCATCGATGTGC |
| 3-5       | SE1040           | TCGATGTGGAATGAAGGTGAAGTCGTAACAAGG | CAGCTAAAGCGTTCTTCATCGATGTGC      |
| 3-6       | SE1024           | AGCTTGGATAGAAGGTGAAGTCGTAACAAGG   | TAAGCTAACAGCGTTCTTCATCGATGTGC    |
| 3-7       | SE1050           | TTTAAGCGACGAAGGTGAAGTCGTAACAAGG   | ACCGGCGTTAGCGTTCTTCATCGATGTGC    |
| 3-8       | SE1040           | TATACTTGTGAAGGTGAAGTCGTAACAAGG    | CCTGACGTGAAGCGTTCTTCATCGATGTGC   |
| 4-1       | HU1007           | CTTCAAGGGAAGGTGAAGTCGTAACAAGG     | TGCGCGGCTCAAGCGTTCTTCATCGATGTGC  |
| 4-2       | HU1001           | TAACAAGGAAGGTGAAGTCGTAACAAGG      | AGCATTGAGATGAGCGTTCTTCATCGATGTGC |
| 4-3       | HU1052           | GATTATCAGTCGAAGGTGAAGTCGTAACAAGG  | AACGAGAAAGCGTTCTTCATCGATGTGC     |
| 4-4       | PULIDOS          | CCAACGTCCGGAAGGTGAAGTCGTAACAAGG   | AGACGGCTAGCGTTCTTCATCGATGTGC     |
| 4-5       | SE1048           | TAATCAGTGAAGGTGAAGTCGTAACAAGG     | ATTAACTTCCAAGCGTTCTTCATCGATGTGC  |
| 4-6       | SE1050           | AACCAATGAGAAGGTGAAGTCGTAACAAGG    | GAGAAAACAATAGCGTTCTTCATCGATGTGC  |
| 4-7       | SE1048           | GATAAGGGAAGGTGAAGTCGTAACAAGG      | AATTGACAAGTACGCGTTCTTCATCGATGTGC |
| 4-8       | SE1024           | ACTACGTGAAGGTGAAGTCGTAACAAGG      | TCGCGGCCTTTGAGCGTTCTTCATCGATGTGC |
| 5-1       | HU1069           | CAACCGGATTAGGAAGGTGAAGTCGTAACAAGG | GACCTCTAGCGTTCTTCATCGATGTGC      |
| 5-2       | HU1096           | AGTAACCGAAGGAAGGTGAAGTCGTAACAAGG  | TTATTAGAAGCGTTCTTCATCGATGTGC     |
| 5-3       | HU1007           | GTTCTATGCGGAAGGTGAAGTCGTAACAAGG   | CACACACTAGCGTTCTTCATCGATGTGC     |
| 5-4       | HU1082           | TTAACCTACGAAGGTGAAGTCGTAACAAGG    | GCTAATCTTGAGCGTTCTTCATCGATGTGC   |
| 5-5       | HU1007           | CCTGTACACGAAGGTGAAGTCGTAACAAGG    | GCCGCAGAAAGCGTTCTTCATCGATGTGC    |
| 5-6       | HU1082           | CAAACATAGAAGGTGAAGTCGTAACAAGG     | TGCGGTAGCAAAGCGTTCTTCATCGATGTGC  |
| 5-7       | HU1069           | ACAATAGGAAGGTGAAGTCGTAACAAGG      | GAAAGCACCTATAGCGTTCTTCATCGATGTGC |
| 5-8       | HU1094           | AGACGTTACAGAGAAGGTGAAGTCGTAACAAGG | CTAGCGAAGCGTTCTTCATCGATGTGC      |
| 6-1       | HU1027           | GAGCCATTAACGAAGGTGAAGTCGTAACAAGG  | AAACTGTAAGCGTTCTTCATCGATGTGC     |

|     |           |                                   |                                  |
|-----|-----------|-----------------------------------|----------------------------------|
| 6-2 | HU1052    | CAATCCACCAGAAGGTGAAGTCGTAACAAGG   | GGCATAGCAAGCGTTCTTCATCGATGTGC    |
| 6-3 | HU1040    | AGCTCTTCAAGAAGGTGAAGTCGTAACAAGG   | GGAGATTGCAGCGTTCTTCATCGATGTGC    |
| 6-4 | HU1040    | GCAACGGTAGAAGGTGAAGTCGTAACAAGG    | ACTGTACAAAAGCGTTCTTCATCGATGTGC   |
| 6-5 | HU1001    | AGAATTGGAAGGTGAAGTCGTAACAAGG      | GGCCAAGCTATTAGCGTTCTTCATCGATGTGC |
| 6-6 | HU1052    | CTACAGCCTACAGAAGGTGAAGTCGTAACAAGG | TCCTATAAGCGTTCTTCATCGATGTGC      |
| 6-7 | HU1025    | ACCTCAAATGAAGGTGAAGTCGTAACAAGG    | TTAATTTCTAAGCGTTCTTCATCGATGTGC   |
| 6-8 | HU1060    | ACAGACGACCAGAAGGTGAAGTCGTAACAAGG  | TTAAATACAGCGTTCTTCATCGATGTGC     |
| 7-1 | HU1001    | GCGGCCAGGCGAAGGTGAAGTCGTAACAAGG   | CCATTCAGGAGCGTTCTTCATCGATGTGC    |
| 7-2 | HU1094    | ATCCTGCCGAAGGTGAAGTCGTAACAAGG     | TATTCTTGACTAGCGTTCTTCATCGATGTGC  |
| 7-3 | HU1028    | TACTAAACGAAGGTGAAGTCGTAACAAGG     | AAGCATGAAGGAGCGTTCTTCATCGATGTGC  |
| 7-4 | HU1096    | AGCAAGGGAAGGTGAAGTCGTAACAAGG      | GCTGCCGCAATAAGCGTTCTTCATCGATGTGC |
| 7-5 | HU1069    | CCAGGACTGAAGGTGAAGTCGTAACAAGG     | TCTACAACATAAGCGTTCTTCATCGATGTGC  |
| 7-6 | HU1028    | AAGGCGAGAAGGTGAAGTCGTAACAAGG      | GAGGTTATAGGCAGCGTTCTTCATCGATGTGC |
| 7-7 | HU1094    | CAAAGCTTAATAGAAGGTGAAGTCGTAACAAGG | TAGGACCAGCGTTCTTCATCGATGTGC      |
| 7-8 | HU1060    | GGACGAAGAAGGTGAAGTCGTAACAAGG      | TACTCCGATACTAGCGTTCTTCATCGATGTGC |
| 8-1 | HU1025    | GTCCAAAGCGGAAGGTGAAGTCGTAACAAGG   | ATATATCAAAGCGTTCTTCATCGATGTGC    |
| 8-2 | PULIDOS   | TCGTTTAGGTAAGAAGGTGAAGTCGTAACAAGG | ATGGACTAGCGTTCTTCATCGATGTGC      |
| Oo= | Control 3 | GAGTAAACAGAAGGTGAAGTCGTAACAAGG    | TTTGTTCAATAGCGTTCTTCATCGATGTGC   |
| Oo= | Control 3 | GGAGCCTAGAAGGTGAAGTCGTAACAAGG     | CCTATGTTATTAGCGTTCTTCATCGATGTGC  |
| Oo= | Control 3 | GCAAATAGAAGGTGAAGTCGTAACAAGG      | ACTCCGTAGACAAGCGTTCTTCATCGATGTGC |
| Oo≠ | Control 4 | GCAAGCTCTAGAAGGTGAAGTCGTAACAAGG   | TATATGTGTAGCGTTCTTCATCGATGTGC    |
| Oo≠ | Control 4 | GCAAGCTCTAGAAGGTGAAGTCGTAACAAGG   | ACTAAAGAGCGTTCTTCATCGATGTGC      |
| Oo≠ | Control 4 | CACATTATAGGAAGGTGAAGTCGTAACAAGG   | GATAGTAAGAGCGTTCTTCATCGATGTGC    |

---



**Table S6:** Illumina de novo sequencing results of soil total DNA library, from soil samples of *Quercus ilex* dehesas of the Andalusian Network for Damage Monitoring in Forest Ecosystems. A: Statistics of the sequencing project referred to the whole raw data. B: Resume of debarcoded sequences to the fungi and oomycete dataset after debarcoding and grouping of ITS1F/2 and ITS6/7 identified tagged primers.

**A**

| Type                 | %Q30   | MeanQ | #Cluster   |
|----------------------|--------|-------|------------|
| Illumina MiSeq 2x300 | 84.34% | 33.52 | 14 732 937 |

**B**

| Features                     | Project    | <i>Debarcoded Seqs.</i> |           |
|------------------------------|------------|-------------------------|-----------|
|                              |            | ITS1F/2                 | ITS6/7    |
| <i>Forward sequence only</i> | 3 639 702  | 2 375 465               | 1 264 259 |
| <i>Reverse sequence only</i> | 1 805 367  | 1 456 828               | 348 535   |
| <i>Paired sequences</i>      | 8 041 574  | 6 769 397               | 1 272 177 |
| <i>Mean freq. Per sample</i> | 101 366.60 | 90 593.20               | 9025.70   |
| <i>Sign. OTU's</i>           | 4193       | 3912                    | 281       |
| <i>Mean OTU freq</i>         | 1378.00    | 1343.10                 | 1862.90   |

**Table S7:** Parameters of sequence processing in CLC Genomics Workbench 3.6.5.

| Input                            | Value  |
|----------------------------------|--------|
| <i>Trimming limit</i>            | 0.5    |
| <i>Ambiguous bases threshold</i> | 0      |
| <i>Minimum read size</i>         | 100 bp |
| <i>Maximum read size</i>         | 500 bp |
| <i>Overlapping mismatch</i>      | 1      |
| <i>Overlapping gap cost</i>      | 3      |
| <i>Minimum score</i>             | 50     |

**Table S8** LCA Parameters of taxonomy processing in MEGAN 6.10.8

| Input                              | Value |
|------------------------------------|-------|
| <i>Minimum score threshold</i>     | 170   |
| <i>Minimum sequence similarity</i> | 99%   |
| <i>Minimum LCA percent</i>         | 50%   |

**Table S9** References of the revised functional guilds (page 1 of 6)

| <b>OTU ID</b>  | <b>Taxon</b>      | <b>Guild</b>          | <b>Citation/Source</b>                                                                         |
|----------------|-------------------|-----------------------|------------------------------------------------------------------------------------------------|
| fungi_OTU_1017 | Peniophora        | Plant Pathogen        | doi.org/10.1016/S0953-7562(96)80118-3                                                          |
| fungi_OTU_1027 | Thelephora        | Ectomycorrhizal       | ISBN 978-0-85198-786-6                                                                         |
| fungi_OTU_1033 | Gelasinospora     | Soil-Plant Saprotroph | Lundqvist N, (1972). Nordic Sordariaceae S. Lat. Symbolae Botanicae Upsaliensis, 20:1-374      |
| fungi_OTU_104  | Trichophaea       | Soil-Plant Saprotroph | Kanouse B. (1958). Some Speccies of the Genus Trichophaea. Mycologia, 50:121-140               |
| fungi_OTU_1065 | Thelephora        | Ectomycorrhizal       | ISBN 978-0-85198-786-6                                                                         |
| fungi_OTU_1080 | Peniophora        | Plant Pathogen        | doi.org/10.1016/S0953-7562(96)80118-3                                                          |
| fungi_OTU_1192 | Sordaria          | Dung Saprotroph       | Guarro J, Arx JA. (1987) The Ascomycete genus Sordaria. Persoonia 13:301-313                   |
| fungi_OTU_1205 | Gelasinospora     | Soil-Plant Saprotroph | Lundqvist N, (1972). Nordic Sordariaceae S. Lat. Symbolae Botanicae Upsaliensis, 20:1-374      |
| fungi_OTU_1245 | Hawksworthiomyces | Soil-Plant Saprotroph | 10.1016/j.funbio.2016.07.004                                                                   |
| fungi_OTU_1342 | Coprinellus       | Soil-Plant Saprotroph | 10.3852/11-149                                                                                 |
| fungi_OTU_1415 | Ppseudareulia     | Soil-Plant Saprotroph | <a href="http://www.indexfungorum.org">http://www.indexfungorum.org</a>                        |
| fungi_OTU_1429 | Preussia          | Dung Saprotroph       | Lumbsch, H. T. and S.M. Huhndorf (ed.) 2007. Outline of Ascomycota – 2007. Myconet 13: 1 - 58. |
| fungi_OTU_1431 | Peniophora        | Plant Pathogen        | doi.org/10.1016/S0953-7562(96)80118-3                                                          |
| fungi_OTU_1434 | Preussia          | Dung Saprotroph       | Lumbsch, H. T. and S.M. Huhndorf (ed.) 2007. Outline of Ascomycota – 2007. Myconet 13: 1 - 58. |
| fungi_OTU_152  | Thelephora        | Ectomycorrhizal       | ISBN 978-0-85198-786-6                                                                         |
| fungi_OTU_1535 | Laccaria          | Ectomycorrhizal       | doi.org/10.1016/0167-8809(90)90043-D                                                           |
| fungi_OTU_1578 | Scedosporium      | Animal Pathogen       | doi.org/10.4067/S0716-10182012000300014                                                        |
| fungi_OTU_160  | Ramophialophora   | Soil-Plant Saprotroph | doi.org/10.3852/09-128                                                                         |
| fungi_OTU_1604 | Verrucaria        | Lichenized            | doi.org/10.1016/j.mycres.2007.08.010                                                           |
| fungi_OTU_1679 | Microdochium      | Plant Pathogen        | doi.org/10.1139/b72-240                                                                        |
| fungi_OTU_1721 | Cephalotrichum    | Soil-Plant Saprotroph | doi.org/10.1016/j.simyco.2017.09.001                                                           |
| fungi_OTU_1737 | Pseudophialophora | >1 guild              | doi.org/10.3852/13-306                                                                         |
| fungi_OTU_1780 | Thelephora        | Ectomycorrhizal       | ISBN 978-0-85198-786-6                                                                         |
| fungi_OTU_1811 | Oidiodendron      | Soil-Plant Saprotroph | doi.org/10.3114/sim.53.1.83                                                                    |
| fungi_OTU_1815 | Apiosordaria      | Dung saprotroph       | Krug, J.C., Udagawa, S., Jeng, R.S. (1983). The genus Apiiosordaria. Mycotaxon 17:533-549      |
| fungi_OTU_1846 | Peniophora        | Plant Pathogen        | doi.org/10.1016/S0953-7562(96)80118-3                                                          |
| fungi_OTU_1875 | Oidiodendron      | Soil-Plant Saprotroph | doi.org/10.3114/sim.53.1.83                                                                    |
| fungi_OTU_1881 | Calyprella        | Plant Pathogen        | doi.org/10.1111/j.1365-3059.1983.tb01306.x                                                     |
| fungi_OTU_197  | Microdochium      | Plant Pathogen        | doi.org/10.1139/b72-240                                                                        |
| fungi_OTU_1979 | Preussia          | Dung Saprotroph       | Lumbsch, H. T. and S.M. Huhndorf (ed.) 2007. Outline of Ascomycota – 2007. Myconet 13: 1 - 58. |

**Table S9** References of the revised functional guilds (page 2 of 6)

| <b>OTU ID</b>  | <b>Taxon</b>       | <b>Guild</b>          | <b>Citation/Source</b>                                                                                                                      |
|----------------|--------------------|-----------------------|---------------------------------------------------------------------------------------------------------------------------------------------|
| fungi_OTU_1994 | Cryptotrichosporon | Soil-Plant Saprotroph | doi.org/10.1111/j.1567-1364.2006.00164.x                                                                                                    |
| fungi_OTU_2030 | Heteroconium       | Endophyte             | doi.org/10.1016/j.femsle.2005.08.039                                                                                                        |
| fungi_OTU_2156 | Rutstroemia        | Soil-Plant Saprotroph | Lumbsch TH, Huhndorf SM. (2007). Outline of Ascomycota – 2007. Myconet. Chicago, USA: The Field Museum, Department of Botany. 13: 1–58.     |
| fungi_OTU_2167 | Oidiodendron       | Soil-Plant Saprotroph | doi.org/10.3114/sim.53.1.83                                                                                                                 |
| fungi_OTU_2197 | Sordaria           | Dung Saprotroph       | Guarro J, Arx JA. (1987) The Ascomycete genus Sordaria. Persoonia 13:301-313                                                                |
| fungi_OTU_2207 | Monosporascus      | Plant Pathogen        | Lobo Ruano et al., 1990 Bol. San Veg y Plagas 16:701-707                                                                                    |
| fungi_OTU_2210 | Cadophora          | Plant Pathogen        | doi.org/10.1016/j.funbio.2014.11.002                                                                                                        |
| fungi_OTU_2218 | Rutstroemia        | Soil-Plant Saprotroph | Lumbsch TH, Huhndorf SM. (2007). "Outline of Ascomycota – 2007". Myconet. Chicago, USA: The Field Museum, Department of Botany. 13: 1–58.   |
| fungi_OTU_2231 | Pseudophialophora  | >1 guild              | doi.org/10.3852/13-306                                                                                                                      |
| fungi_OTU_2245 | Scutellinia        | Soil-Plant Saprotroph | Schumacher, T. (1990). The genus Scutellinia (Pyronemataceae). Opera Botanica 101: 1-107                                                    |
| fungi_OTU_2318 | Pseudogymnoascus   | Soil-Plant Saprotroph | doi.org/10.1007/bf02461670.                                                                                                                 |
| fungi_OTU_2340 | Pseudophialophora  | >1 guild              | doi.org/10.3852/13-306                                                                                                                      |
| fungi_OTU_2375 | Cadophora          | Plant Pathogen        | doi.org/10.1016/j.funbio.2014.11.002                                                                                                        |
| fungi_OTU_2389 | Hawksworthiomyces  | Soil-Plant Saprotroph | doi.org/10.1016/j.funbio.2016.07.004                                                                                                        |
| fungi_OTU_2407 | Delicatula         | Soil-Plant Saprotroph | Velenovský J. (1947). Novitates mycologicae novissimae. Opera botanica Čechica (in Latin). 4. Prague: Societas Botanica Českoslovaca. p. 33 |
| fungi_OTU_2439 | Spizellomyces      | Soil-Plant Saprotroph | doi.org/10.2307/3792840                                                                                                                     |
| fungi_OTU_2464 | Syncephalis        | Fungal Parasite       | doi.org/10.2307/3756922                                                                                                                     |
| fungi_OTU_2498 | Tetracladium       | Soil-Plant Saprotroph | doi.org/10.11646/phytotaxa.338.3.5                                                                                                          |
| fungi_OTU_253  | Oidiodendron       | Soil-Plant Saprotroph | doi.org/10.3114/sim.53.1.83                                                                                                                 |
| fungi_OTU_2531 | Ppseudareulia      | Soil-Plant Saprotroph | <a href="http://www.indexfungorum.org">http://www.indexfungorum.org</a>                                                                     |
| fungi_OTU_2533 | Oidiodendron       | Soil-Plant Saprotroph | doi.org/10.3114/sim.53.1.83                                                                                                                 |
| fungi_OTU_259  | Preussia           | Dung Saprotroph       | Lumbsch, H. T. and S.M. Huhndorf (ed.) 2007. Outline of Ascomycota – 2007. Myconet 13: 1 - 58.                                              |
| fungi_OTU_2590 | Vermispora         | Animal Pathogen       | Burghouts, T.; Gams, W. (1989). Vermispora fusarina, a new hyphomycete parasitizing cyst nematodes. Mem. N. Y. bot. Gdn 49: 57-61.          |
| fungi_OTU_2668 | Oidiodendron       | Soil-Plant Saprotroph | doi.org/10.3114/sim.53.1.83                                                                                                                 |
| fungi_OTU_275  | Preussia           | Dung Saprotroph       | Lumbsch, H. T. and S.M. Huhndorf (ed.) 2007. Outline of Ascomycota – 2007. Myconet 13: 1 - 58.                                              |
| fungi_OTU_2758 | Monacrosporium     | Animal Pathogen       | doi.org/10.1128/AEM.01390-13.                                                                                                               |
| fungi_OTU_2830 | Oidiodendron       | Soil-Plant Saprotroph | doi.org/10.3114/sim.53.1.83                                                                                                                 |
| fungi_OTU_2840 | Hohenbuehelia      | Animal Pathogen       | doi.org/10.1139/b77-345                                                                                                                     |

**Table S9** References of the revised functional guilds (page 3 of 6)

| OTU ID         | Taxon              | Guild                 | Citation/Source                                                                                                                                   |
|----------------|--------------------|-----------------------|---------------------------------------------------------------------------------------------------------------------------------------------------|
| fungi_OTU_289  | Trichophaea        | Soil-Plant Saprotroph | Kanouse B. (1958). Some Speccies of the Genus Trichophaea. Mycologia, 50:121-140                                                                  |
| fungi_OTU_2927 | Peniophora         | Plant Pathogen        | doi.org/10.1016/S0953-7562(96)80118-3                                                                                                             |
| fungi_OTU_2974 | Sordaria           | Dung Saprotroph       | Guarro J, Arx JA. (1987) The Ascomycete genus Sordaria. Persoonia 13:301-313                                                                      |
| fungi_OTU_2979 | Preussia           | Dung Saprotroph       | Lumbsch, H. T. and S.M. Huhndorf (ed.) 2007. Outline of Ascomycota – 2007. Myconet 13: 1 - 58.                                                    |
| fungi_OTU_2986 | Cryptotrichosporon | Soil-Plant Saprotroph | doi.org/10.1111/j.1567-1364.2006.00164.x                                                                                                          |
| fungi_OTU_3062 | Monosporascus      | Plant Pathogen        | Lobo Ruano et al., 1990 Bol. San Veg y Plagas 16:701-707                                                                                          |
| fungi_OTU_3096 | Tetracladium       | Soil-Plant Saprotroph | doi.org/10.11646/phytotaxa.338.3.5                                                                                                                |
| fungi_OTU_3101 | Preussia           | Dung Saprotroph       | Lumbsch, H. T. and S.M. Huhndorf (ed.) 2007. Outline of Ascomycota – 2007. Myconet 13: 1 - 58.                                                    |
| fungi_OTU_3112 | Ramicandelaber     | Soil-Plant Saprotroph | doi.org/10.1017/S0953756204000930                                                                                                                 |
| fungi_OTU_3212 | Coprinellus        | Soil-Plant Saprotroph | doi.org/10.3852/11-149                                                                                                                            |
| fungi_OTU_323  | Distoseptispora    | Soil-Plant Saprotroph | doi.org/10.1007/s13225-016-0373-x                                                                                                                 |
| fungi_OTU_3291 | Ramicandelaber     | Soil-Plant Saprotroph | doi.org/10.1017/S0953756204000930                                                                                                                 |
| fungi_OTU_3327 | Peniophora         | Plant Pathogen        | doi.org/10.1016/S0953-7562(96)80118-3                                                                                                             |
| fungi_OTU_3332 | Pseudophialophora  | >1 guild              | doi.org/10.3852/13-306                                                                                                                            |
| fungi_OTU_3434 | Rhexodenticula     | Soil-Plant Saprotroph | <a href="http://www.indexfungorum.org">http://www.indexfungorum.org</a>                                                                           |
| fungi_OTU_3524 | Coprinellus        | Soil-Plant Saprotroph | doi.org/10.3852/11-149                                                                                                                            |
| fungi_OTU_3556 | Monosporascus      | Plant Pathogen        | Lobo Ruano et al., 1990 Bol. San Veg y Plagas 16:701-707                                                                                          |
| fungi_OTU_3563 | Cercophora         | Soil-Plant Saprotroph | doi.org/10.3852/11-005                                                                                                                            |
| fungi_OTU_3687 | Peniophora         | Plant Pathogen        | doi.org/10.1016/S0953-7562(96)80118-3                                                                                                             |
| fungi_OTU_3698 | Oidiodendron       | Soil-Plant Saprotroph | doi.org/10.3114/sim.53.1.83                                                                                                                       |
| fungi_OTU_3759 | Peniophora         | Plant Pathogen        | doi.org/10.1016/S0953-7562(96)80118-3                                                                                                             |
| fungi_OTU_3774 | Sordaria           | Dung Saprotroph       | Guarro J, Arx JA. (1987) The Ascomycete genus Sordaria. Persoonia 13:301-313                                                                      |
| fungi_OTU_387  | Gymnoascus         | Soil-Plant Saprotroph | Lumbsch TH, Huhndorf SM (December 2007). "Outline of Ascomycota – 2007". Myconet. Chicago, USA: The Field Museum, Department of Botany. 13: 1–58. |
| fungi_OTU_3902 | Parasola           | Soil-Plant Saprotroph | doi.org/10.1080/00275514.2017.1386526                                                                                                             |
| fungi_OTU_3903 | Microascus         | Soil-Plant Saprotroph | doi.org/10.2323/jgam.8.39                                                                                                                         |
| fungi_OTU_3979 | Peniophora         | Plant Pathogen        | doi.org/10.1016/S0953-7562(96)80118-3                                                                                                             |
| fungi_OTU_437  | Trichophaea        | Soil-Plant Saprotroph | Kanouse B. (1958). Some Speccies of the Genus Trichophaea. Mycologia, 50:121-140                                                                  |
| fungi_OTU_443  | Cadophora          | Plant Pathogen        | doi.org/10.1016/j.funbio.2014.11.002                                                                                                              |
| fungi_OTU_45   | Laccaria           | Ectomycorrhizal       | doi.org/10.1016/0167-8809(90)90043-D                                                                                                              |
| fungi_OTU_584  | Sordaria           | Dung Saprotroph       | Guarro J, Arx JA. (1987) The Ascomycete genus Sordaria. Persoonia 13:301-313                                                                      |

**Table S9** References of the revised functional guilds (page 4 of 6)

| <b>OTU ID</b>    | <b>Taxon</b>        | <b>Guild</b>                                   | <b>Citation/Source</b>                                                                                                                                                                                                                                       |
|------------------|---------------------|------------------------------------------------|--------------------------------------------------------------------------------------------------------------------------------------------------------------------------------------------------------------------------------------------------------------|
| fungi_OTU_59     | Laccaria            | Ectomycorrhizal                                | doi.org/10.1016/0167-8809(90)90043-D                                                                                                                                                                                                                         |
| fungi_OTU_598    | Tremellodendron     | >1 guild                                       | Weiss M, Selosse MA, Rexer KH, Urban A, Oberwinkler F (2004). "Sebacinales: a hitherto overlooked cosm of heterobasidiomycetes with a broad mycorrhizal potential". Mycological Research. 108 (Pt 9): 1003–10. doi:10.1017/S0953756204000772. PMID 15506013. |
| fungi_OTU_602    | Cadophora           | Plant Pathogen                                 | doi.org/10.1016/j.funbio.2014.11.002                                                                                                                                                                                                                         |
| fungi_OTU_618    | Cutaneotrichosporon | Animal Pathogen                                | doi.org/10.1007/s00203-016-1254-0                                                                                                                                                                                                                            |
| fungi_OTU_621    | Preussia            | Dung Saprotroph                                | Lumbsch, H. T. and S.M. Huhndorf (ed.) 2007. Outline of Ascomycota – 2007. Myconet 13: 1 - 58.                                                                                                                                                               |
| fungi_OTU_674    | Monosporascus       | Plant Pathogen                                 | Lobo Ruano et al., 1990 Bol. San Veg y Plagas 16:701-707                                                                                                                                                                                                     |
| fungi_OTU_685    | Thelephora          | Ectomycorrhizal                                | ISBN 978-0-85198-786-6                                                                                                                                                                                                                                       |
| fungi_OTU_70     | Ppseudareulia       | Soil-Plant Saprotroph                          | <a href="http://www.indexfungorum.org">http://www.indexfungorum.org</a>                                                                                                                                                                                      |
| fungi_OTU_71     | Thelephora          | Ectomycorrhizal                                | ISBN 978-0-85198-786-6                                                                                                                                                                                                                                       |
| fungi_OTU_722    | Cercophora          | Soil-Plant Saprotroph                          | doi.org/10.3852/11-005                                                                                                                                                                                                                                       |
| fungi_OTU_744    | Cadophora           | Plant Pathogen                                 | doi.org/10.1016/j.funbio.2014.11.002                                                                                                                                                                                                                         |
| fungi_OTU_75     | Sordaria            | Dung Saprotroph                                | Guarro J, Arx JA. (1987) The Ascomycete genus Sordaria. Persoonia 13:301-313                                                                                                                                                                                 |
| fungi_OTU_79     | Wilcoxinia          | Ectomycorrhizal                                | Nakas, J.P., Hagedorn, C. (1990). Biotechnology of Plan-Microbe interactions. McGraw-Hill. ISBN 978-0-07-045867-3                                                                                                                                            |
| fungi_OTU_816    | Peniophora          | Plant Pathogen                                 | doi.org/10.1016/S0953-7562(96)80118-3                                                                                                                                                                                                                        |
| fungi_OTU_839    | Sordaria            | Dung Saprotroph                                | Guarro J, Arx JA. (1987) The Ascomycete genus Sordaria. Persoonia 13:301-313                                                                                                                                                                                 |
| fungi_OTU_846    | Peniophora          | Plant Pathogen                                 | doi.org/10.1016/S0953-7562(96)80118-3                                                                                                                                                                                                                        |
| fungi_OTU_862    | Cadophora           | Plant Pathogen                                 | doi.org/10.1016/j.funbio.2014.11.002                                                                                                                                                                                                                         |
| fungi_OTU_863    | Monosporascus       | Plant Pathogen                                 | Lobo Ruano et al., 1990 Bol. San Veg y Plagas 16:701-707                                                                                                                                                                                                     |
| fungi_OTU_879    | Monosporascus       | Plant Pathogen                                 | Lobo Ruano et al., 1990 Bol. San Veg y Plagas 16:701-707                                                                                                                                                                                                     |
| fungi_OTU_898    | Tetracladium        | Soil-Plant Saprotroph                          | doi.org/10.11646/phytotaxa.338.3.5                                                                                                                                                                                                                           |
| fungi_OTU_904    | Ppseudareulia       | Soil-Plant Saprotroph                          | <a href="http://www.indexfungorum.org">http://www.indexfungorum.org</a>                                                                                                                                                                                      |
| fungi_OTU_907    | Vascellum           | Soil-Plant Saprotroph                          | doi.org/10.5943/mycosphere/4/4/11                                                                                                                                                                                                                            |
| fungi_OTU_955    | Preussia            | Dung Saprotroph                                | Lumbsch, H. T. and S.M. Huhndorf (ed.) 2007. Outline of Ascomycota – 2007. Myconet 13: 1 - 58.                                                                                                                                                               |
| oomycete_OTU_126 | Myzocytiopsis       | Animal Pathogen                                | Glockling and Beakes, 2000. A review of the taxonomy, biology and infection strategies of "biflagellate holocarpic" parasites of nematodes. Fungal Diversity 4: 1-20                                                                                         |
| oomycete_OTU_130 | Lagenidium          | Pathotroph-Saprotroph<br>Opportunistic species | doi.org/10.1007/s13225-014-0298-1                                                                                                                                                                                                                            |
| oomycete_OTU_150 | Apodachlya          | Soil-Plant Saprotroph                          | doi.org/10.1007/BF00418292                                                                                                                                                                                                                                   |

**Table S9** References of the revised functional guilds (page 5 of 6)

| OTU ID           | Taxon         | Guild                                          | Citation/Source                                                                                                                                                                                                                                                                                                                                                                                                                                                                                                                                                                                                                                                     |
|------------------|---------------|------------------------------------------------|---------------------------------------------------------------------------------------------------------------------------------------------------------------------------------------------------------------------------------------------------------------------------------------------------------------------------------------------------------------------------------------------------------------------------------------------------------------------------------------------------------------------------------------------------------------------------------------------------------------------------------------------------------------------|
| oomycete_OTU_156 | Saprolegnia   | Pathotroph-Saprotroph<br>Opportunistic species | 1) Beakes, G.W., Wood, S.E. & Burr, A.W. (1994) Features which characterize Saprolegnia isolates from salmon fish lesions – a review. In: Mueller, G.J. (Ed.) Salmon Saprolegniasis. Report to Bonneville Power Administration. Environment, Fish and Wildlife Division, Portland, Oregon. pp. 33–66. 2) van den Berg, A.H., McLaggan, D., Diéguez-Uribeondo, J. & van West, P. (2013) The impact of the water moulds Saprolegnia diclina and Saprolegnia parasitica on natural ecosystems and the aquaculture industry. Fungal Biology Reviews 27: 33–42.<br><a href="http://dx.doi.org/10.1016/j.fbr.2013.05.001">http://dx.doi.org/10.1016/j.fbr.2013.05.001</a> |
| oomycete_OTU_171 | Saprolegnia   | Pathotroph-Saprotroph<br>Opportunistic species | 1) Beakes, G.W., Wood, S.E. & Burr, A.W. (1994) Features which characterize Saprolegnia isolates from salmon fish lesions – a review. In: Mueller, G.J. (Ed.) Salmon Saprolegniasis. Report to Bonneville Power Administration. Environment, Fish and Wildlife Division, Portland, Oregon. pp. 33–66. 2) van den Berg, A.H., McLaggan, D., Diéguez-Uribeondo, J. & van West, P. (2013) The impact of the water moulds Saprolegnia diclina and Saprolegnia parasitica on natural ecosystems and the aquaculture industry. Fungal Biology Reviews 27: 33–42.<br><a href="http://dx.doi.org/10.1016/j.fbr.2013.05.001">http://dx.doi.org/10.1016/j.fbr.2013.05.001</a> |
| oomycete_OTU_197 | Saprolegnia   | Pathotroph-Saprotroph<br>Opportunistic species | 1) Beakes, G.W., Wood, S.E. & Burr, A.W. (1994) Features which characterize Saprolegnia isolates from salmon fish lesions – a review. In: Mueller, G.J. (Ed.) Salmon Saprolegniasis. Report to Bonneville Power Administration. Environment, Fish and Wildlife Division, Portland, Oregon. pp. 33–66. 2) van den Berg, A.H., McLaggan, D., Diéguez-Uribeondo, J. & van West, P. (2013) The impact of the water moulds Saprolegnia diclina and Saprolegnia parasitica on natural ecosystems and the aquaculture industry. Fungal Biology Reviews 27: 33–42.<br><a href="http://dx.doi.org/10.1016/j.fbr.2013.05.001">http://dx.doi.org/10.1016/j.fbr.2013.05.001</a> |
| oomycete_OTU_211 | Myzocytiopsis | Animal Pathogen                                | Glocking and Beakes, 2000. A review of the taxonomy, biology and infection strategies of "biflagellate holocarpic" parasites of nematodes. Fungal Diversity 4: 1-20                                                                                                                                                                                                                                                                                                                                                                                                                                                                                                 |
| oomycete_OTU_213 | Saprolegnia   | Pathotroph-Saprotroph<br>Opportunistic species | 1) Beakes, G.W., Wood, S.E. & Burr, A.W. (1994) Features which characterize Saprolegnia isolates from salmon fish lesions – a review. In: Mueller, G.J. (Ed.) Salmon Saprolegniasis. Report to Bonneville Power Administration. Environment, Fish and Wildlife Division, Portland, Oregon. pp. 33–66. 2) van den Berg, A.H., McLaggan, D., Diéguez-Uribeondo, J. & van West, P. (2013) The impact of the water moulds Saprolegnia diclina and Saprolegnia parasitica on natural ecosystems and the aquaculture industry. Fungal Biology Reviews 27: 33–42.<br><a href="http://dx.doi.org/10.1016/j.fbr.2013.05.001">http://dx.doi.org/10.1016/j.fbr.2013.05.001</a> |
| oomycete_OTU_247 | Myzocytiopsis | Animal Pathogen                                | Glocking and Beakes, 2000. A review of the taxonomy, biology and infection strategies of "biflagellate holocarpic" parasites of nematodes. Fungal Diversity 4: 1-20                                                                                                                                                                                                                                                                                                                                                                                                                                                                                                 |

**Table S9** References of the revised functional guilds (page 6 of 6)

| OTU ID           | Taxon          | Guild                                          | Citation/Source                                                                                                                                                                                                                                                                                                                                                                                                                                                                                                                                                                                                                                                     |
|------------------|----------------|------------------------------------------------|---------------------------------------------------------------------------------------------------------------------------------------------------------------------------------------------------------------------------------------------------------------------------------------------------------------------------------------------------------------------------------------------------------------------------------------------------------------------------------------------------------------------------------------------------------------------------------------------------------------------------------------------------------------------|
| oomycete_OTU_253 | Saprolegnia    | Pathotroph-Saprotroph<br>Opportunistic species | 1) Beakes, G.W., Wood, S.E. & Burr, A.W. (1994) Features which characterize Saprolegnia isolates from salmon fish lesions – a review. In: Mueller, G.J. (Ed.) Salmon Saprolegniasis. Report to Bonneville Power Administration. Environment, Fish and Wildlife Division, Portland, Oregon. pp. 33–66. 2) van den Berg, A.H., McLaggan, D., Diéguez-Uribeondo, J. & van West, P. (2013) The impact of the water moulds Saprolegnia diclina and Saprolegnia parasitica on natural ecosystems and the aquaculture industry. Fungal Biology Reviews 27: 33–42.<br><a href="http://dx.doi.org/10.1016/j.fbr.2013.05.001">http://dx.doi.org/10.1016/j.fbr.2013.05.001</a> |
| oomycete_OTU_262 | Saprolegnia    | Pathotroph-Saprotroph<br>Opportunistic species | 1) Beakes, G.W., Wood, S.E. & Burr, A.W. (1994) Features which characterize Saprolegnia isolates from salmon fish lesions – a review. In: Mueller, G.J. (Ed.) Salmon Saprolegniasis. Report to Bonneville Power Administration. Environment, Fish and Wildlife Division, Portland, Oregon. pp. 33–66. 2) van den Berg, A.H., McLaggan, D., Diéguez-Uribeondo, J. & van West, P. (2013) The impact of the water moulds Saprolegnia diclina and Saprolegnia parasitica on natural ecosystems and the aquaculture industry. Fungal Biology Reviews 27: 33–42.<br><a href="http://dx.doi.org/10.1016/j.fbr.2013.05.001">http://dx.doi.org/10.1016/j.fbr.2013.05.001</a> |
| oomycete_OTU_280 | Plectospora    | Plant Pathogen                                 | <a href="https://doi.org/10.11646/phytotaxa.307.3.3">doi.org/10.11646/phytotaxa.307.3.3</a>                                                                                                                                                                                                                                                                                                                                                                                                                                                                                                                                                                         |
| oomycete_OTU_41  | Saprolegnia    | Pathotroph-Saprotroph<br>Opportunistic species | 1) Beakes, G.W., Wood, S.E. & Burr, A.W. (1994) Features which characterize Saprolegnia isolates from salmon fish lesions – a review. In: Mueller, G.J. (Ed.) Salmon Saprolegniasis. Report to Bonneville Power Administration. Environment, Fish and Wildlife Division, Portland, Oregon. pp. 33–66. 2) van den Berg, A.H., McLaggan, D., Diéguez-Uribeondo, J. & van West, P. (2013) The impact of the water moulds Saprolegnia diclina and Saprolegnia parasitica on natural ecosystems and the aquaculture industry. Fungal Biology Reviews 27: 33–42.<br><a href="http://dx.doi.org/10.1016/j.fbr.2013.05.001">http://dx.doi.org/10.1016/j.fbr.2013.05.001</a> |
| oomycete_OTU_55  | Apodachlya     | Soil-Plant Saprotroph                          | <a href="https://doi.org/10.1007/BF00418292">doi.org/10.1007/BF00418292</a>                                                                                                                                                                                                                                                                                                                                                                                                                                                                                                                                                                                         |
| oomycete_OTU_65  | Paralagenidium | Animal Pathogen                                | Grooters AM, 2008. Pythiosis and Lagenidiosis. In: Boagura JD, Twedt DC (eds), Kirk's Current Veterinary Therapy XIV. Saunders Elsevier, St. Louis, MO, pp. 1268e1271.                                                                                                                                                                                                                                                                                                                                                                                                                                                                                              |
| oomycete_OTU_79  | Lagenidium     | Pathotroph-Saprotroph<br>Opportunistic species | <a href="https://doi.org/10.1007/s13225-014-0298-1">doi.org/10.1007/s13225-014-0298-1</a>                                                                                                                                                                                                                                                                                                                                                                                                                                                                                                                                                                           |
| oomycete_OTU_85  | Saprolegnia    | Pathotroph-Saprotroph<br>Opportunistic species | 1) Beakes, G.W., Wood, S.E. & Burr, A.W. (1994) Features which characterize Saprolegnia isolates from salmon fish lesions – a review. In: Mueller, G.J. (Ed.) Salmon Saprolegniasis. Report to Bonneville Power Administration. Environment, Fish and Wildlife Division, Portland, Oregon. pp. 33–66. 2) van den Berg, A.H., McLaggan, D., Diéguez-Uribeondo, J. & van West, P. (2013) The impact of the water moulds Saprolegnia diclina and Saprolegnia parasitica on natural ecosystems and the aquaculture industry. Fungal Biology Reviews 27: 33–42.<br><a href="http://dx.doi.org/10.1016/j.fbr.2013.05.001">http://dx.doi.org/10.1016/j.fbr.2013.05.001</a> |
| oomycete_OTU_88  | Lagenidium     | Pathotroph-Saprotroph<br>Opportunistic species | <a href="https://doi.org/10.1007/s13225-014-0298-1">doi.org/10.1007/s13225-014-0298-1</a>                                                                                                                                                                                                                                                                                                                                                                                                                                                                                                                                                                           |

**Table S10** Taxonomy of the 20 most abundant OTUs, resulting from the Core Biome analysis of the fungal and oomycete microbiomes

| <b>Abund. Pos.</b> | <b>Feature ID</b> | <b>Taxon</b>                                                                                                           |
|--------------------|-------------------|------------------------------------------------------------------------------------------------------------------------|
| 1                  | oomycete_OTU#1    | k_Chromista; p_Oomycota; c_Oomycetes; o_Peronosporales; f_Peronosporaceae; g_Phytophthora; s_Phytophthora plurivora    |
| 2                  | oomycete_OTU#6    | k_Chromista; p_Oomycota; c_Oomycetes; o_Pythiales; f_Pythiaceae; g_Pythium; s_Pythium paroecandrum                     |
| 3                  | oomycete_OTU#10   | k_Chromista; p_Oomycota; c_Oomycetes; o_Peronosporales; f_Peronosporaceae; g_Phytophthora; s_Phytophthora psychrophila |
| 4                  | oomycete_OTU#3    | k_Chromista; p_Oomycota; c_Oomycetes; o_Peronosporales; f_Peronosporaceae; g_Phytophthora quercina                     |
| 5                  | oomycete_OTU#9    | k_Chromista; p_Oomycota; c_Oomycetes; o_Peronosporales; f_Peronosporaceae; g_Phytophthora; s_Phytophthora citrophthora |
| 6                  | oomycete_OTU#17   | k_Chromista; p_Oomycota; c_Oomycetes; o_Pythiales; f_Pythiaceae; g_Pythium; s_Pythium heterothallicum                  |
| 7                  | oomycete_OTU#15   | k_Chromista; p_Oomycota; c_Oomycetes; o_Pythiales; f_Pythiaceae; g_Pythium; s_Pythium irregulare                       |
| 8                  | oomycete_OTU#7    | k_Chromista; p_Oomycota; c_Oomycetes; o_Pythiales; f_Pythiaceae; g_Elongisporangium; s_Elongisporangium undulatum      |
| 9                  | oomycete_OTU#4    | k_Chromista; p_Oomycota; c_Oomycetes; o_Peronosporales; f_Peronosporaceae; g_Phytophthora; s_Phytophthora cinnamomi    |
| 10                 | oomycete_OTU#16   | k_Chromista; p_Oomycota; c_Oomycetes; o_Pythiales; f_Pythiaceae; g_Pythium                                             |
| 1                  | fungi_OTU#3       | k_Fungi; p_Mucoromycota; c_; o_Mortierellales; f_Mortierellaceae; g_Mortierella; s_Mortierella elongata                |
| 2                  | fungi_OTU#2       | k_Fungi; p_Ascomycota; c_Sordariomycetes; o_Hypocreales; f_Nectriaceae; g_Fusarium                                     |
| 3                  | fungi_OTU#8       | k_Fungi; p_Basidiomycota; c_Agaricomycetes; o_Russulales; f_Russulaceae; g_Russula; s_Russula praetervisa              |
| 4                  | fungi_OTU#11      | k_Fungi; p_Mucoromycota; c_; o_Mortierellales; f_Mortierellaceae; g_Mortierella; s_Mortierella elongata                |
| 5                  | fungi_OTU#24      | k_Fungi; p_Basidiomycota; c_Tremellomycetes; o_Filobasidiales; f_Piskurozymaceae; g_Solicoccozyma                      |
| 6                  | fungi_OTU#9       | k_Fungi; p_Ascomycota; c_Sordariomycetes; o_Hypocreales; f_Nectriaceae; g_Thelonectria                                 |
| 7                  | fungi_OTU#25      | k_Fungi; p_Ascomycota; c_Eurotiomycetes; o_Eurotiales; f_Aspergillaceae; g_Penicillium                                 |
| 8                  | fungi_OTU#51      | k_Fungi; p_Ascomycota; c_Sordariomycetes; o_Hypocreales; f_Hypocreaceae; g_Trichoderma                                 |
| 9                  | fungi_OTU#48      | k_Fungi; p_Ascomycota; c_Sordariomycetes; o_Hypocreales; f_Bionectriaceae; g_Clonostachys                              |
| 10                 | fungi_OTU#15      | k_Fungi; p_Ascomycota; c_Sordariomycetes; o_Hypocreales; f_Hypocreaceae; g_Trichoderma                                 |
